# Supplementary material for: TonEBP/NFAT5 haploinsufficiency attenuates hippocampal inflammation in high-fat diet/streptozotocin-induced diabetic mice
Source: Sci Rep. 2017 Aug 10;7:7837. doi: 10.1038/s41598-017-08319-w (PMC5552681; doi:10.1038/s41598-017-08319-w)
Supplement: Supplementary file 1 — Supplementary Information [file 41598_2017_8319_MOESM1_ESM.pdf]

**TonEBP/NFAT5 haploinsufficiency attenuates hippocampal inflammation in high-fat diet/streptozotocin-induced diabetic mice**

Jong Youl Lee<sup>1,2</sup>, Eun Ae Jeong<sup>1,2</sup>, Kyung Eun Kim<sup>1,2</sup>, Chin-ok Yi<sup>1,2</sup>, Zhen Jin<sup>1,2</sup>, Jung Eun Lee<sup>3</sup>, Dong Hoon Lee<sup>1</sup>, Hyun Joon Kim<sup>1,2</sup>, Sang Soo Kang<sup>1</sup>, Gyeong Jae Cho<sup>1</sup>, Wan Sung Choi<sup>1,2</sup>, Soo Youn Choi<sup>4</sup>, H. Moo Kwon<sup>4</sup>, Gu Seob Roh<sup>1,2\*</sup>

**Supplementary Table 1.** List of primary antibodies

| Antibody           | Company        | Catalog No. | Dilution     | Applications | Source     |
|--------------------|----------------|-------------|--------------|--------------|------------|
| Insulin            | Abcam          | Ab7842      | 1:100        | IF           | Guinea Pig |
| NF- $\kappa$ B p65 | Cell signaling | #6956       | 1:1000       | WB           | Mouse      |
| p84                | Abcam          | Ab487       | 1:1000       | WB           | Mouse      |
| LXR $\beta$        | R&D            | K8917       | 1:1000       | WB           | Mouse      |
| SREBP-1            | BD             | 557036      | 1:1000       | WB           | Mouse      |
| PPAR $\alpha$      | Abcam          | Ab8934      | 1:1000       | WB           | Rabbit     |
| TonEBP             | Dr. Kwon       |             | 1:3000,1:200 | WB,IHC,IF    | Rabbit     |
| TonEBP             | Santa cruz     | Sc-5501     | 1:50         | IF           | Goat       |
| GFAP               | Santa cruz     | Sc-6171     | 1:500        | IF           | Goat       |
| IL-6               | Santa cruz     | Sc-1265     | 1:1000       | WB           | Goat       |
| TNF- $\alpha$      | Cell signaling | #3707       | 1:1000       | WB           | Rabbit     |
| C-peptide          | Abcam          | Ab14181     | 1:1000       | IHC          | Rabbit     |
| NeuN               | Millipore      | MAB377      | 1:500        | IF           | Mouse      |
| HMGB1              | Abcam          | Ab18256     | 1:1000,1:100 | WB,IHC,IF    | Rabbit     |
| Iba1               | Wako           | 016-20001   | 1:150        | IHC          | Rabbit     |
| CD68               | Santa cruz     | Sc-9139     | 1:75         | IHC          | Rabbit     |
| $\beta$ -actin     | Sigma          | A5441       | 1:30000      | WB           | Mouse      |
| $\alpha$ -tubulin  | Sigma          | T5168       | 1:30000      | WB           | Mouse      |

WB, western blot; IF, immunofluorescence; IHC, immunohistochemistry

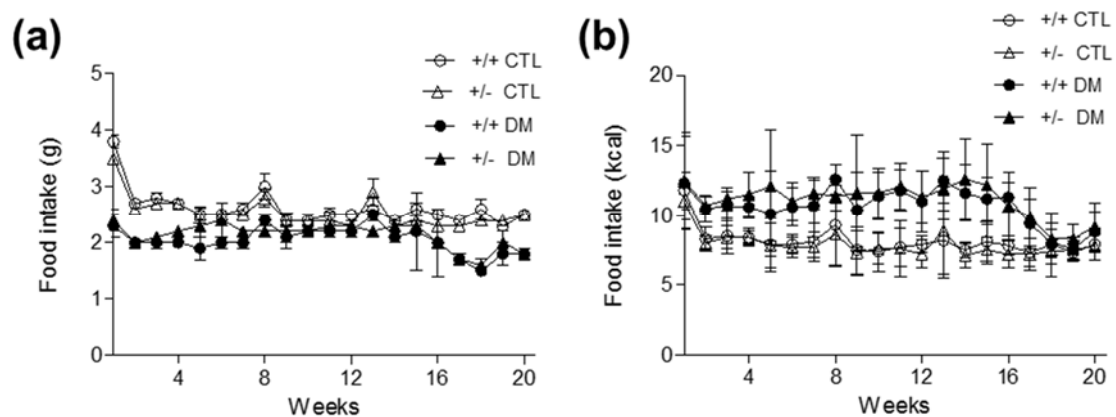

**Supplementary Figure 1. Food intake and total calorie intake of control or HFD/STZ-treated WT and TonEBP<sup>+/-</sup> mice.** Food intake (g) (a) and total calorie intake calculated from the amount of food intake (kcal) (b) by each group of mice; control diet = 3.1 kcal/g, HFD = 5.24 kcal/g (60 kcal% fat).

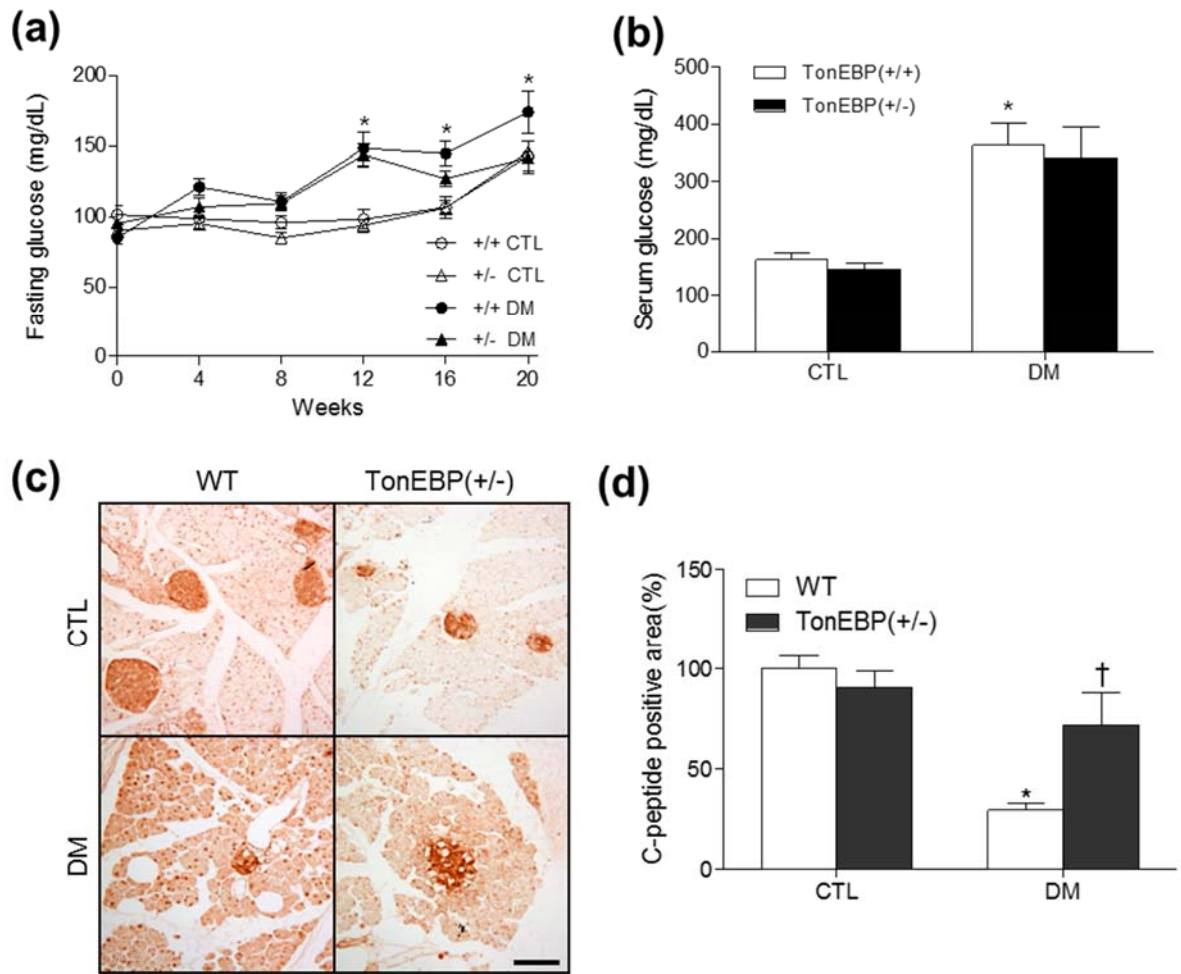

**Supplementary Figure 2. Effects of TonEBP haploinsufficiency on glucose levels and pancreatic C-peptide expression in HFD/STZ-treated mice.** Fasting blood glucose **(a)** for 20 weeks and serum glucose **(b)** in control or HFD/STZ-treated WT and TonEBP<sup>+/-</sup> mice. **(c)** Representative images showing immunofluorescence of C-peptide in pancreatic sections. **(d)** Percentage areas of C-peptide-positive cells. Data are shown as the mean  $\pm$  SEM. \* $P < 0.05$  vs. control (CTL) normal diet-fed mice;  $\dagger P < 0.05$  vs. DM WT mice. Scale bar = 100  $\mu$ m.

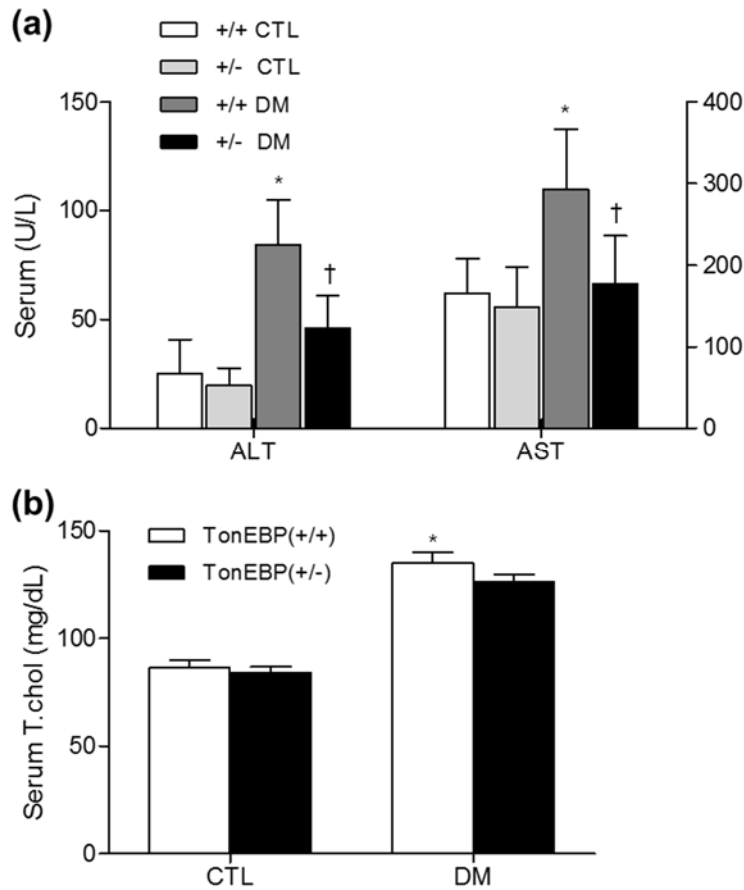

**Supplementary Figure 3. Effects of HFD/STZ treatment on hepatic enzymes and serum total cholesterol in WT and TonEBP<sup>+/-</sup> mice.** Serum hepatic alanine aminotransferase (ALT), aspartate aminotransferase (AST) **(a)**, and total cholesterol **(b)** levels were determined by enzymatic colorimetric assays. Data (n = 10 mice per group) are presented as the mean ± SEM. \* $P < 0.05$  vs. control (CTL) normal diet-fed mice; † $P < 0.05$  vs. DM WT mice.

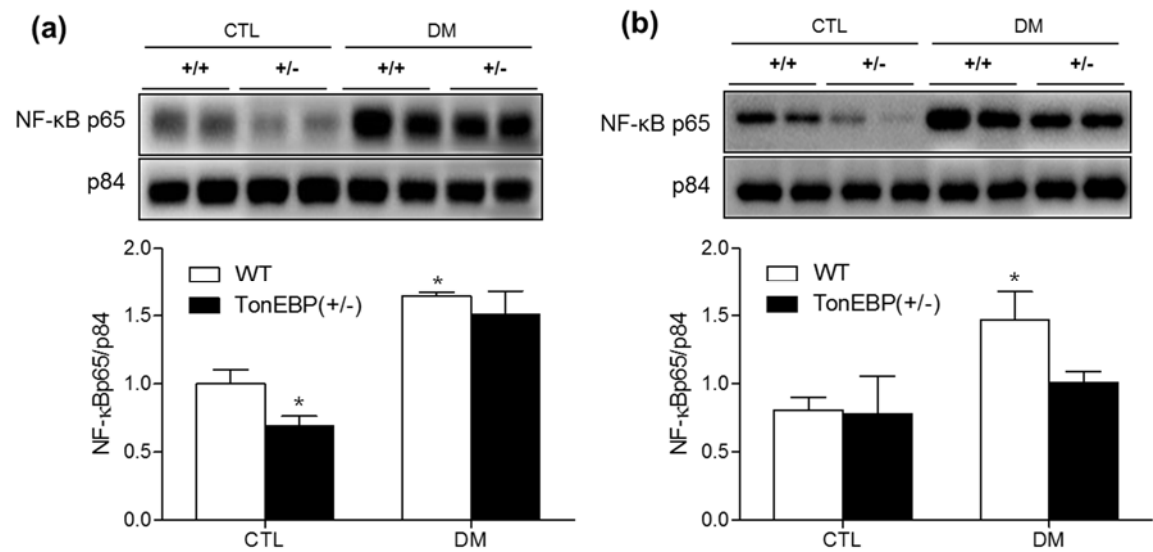

**Supplementary Figure 4. Hepatic and Hippocampal NF-κBp65 expression in HFD/STZ-treated TonEBP<sup>+/-</sup> mice.** Western blots and protein quantification of nuclear TonEBP in the liver **(a)** and hippocampus **(b)**. Data are presented as the mean ± SEM from three separate experiments (n = 6 mice per group). \**P* < 0.05 vs. control (CTL) normal diet-fed mice.

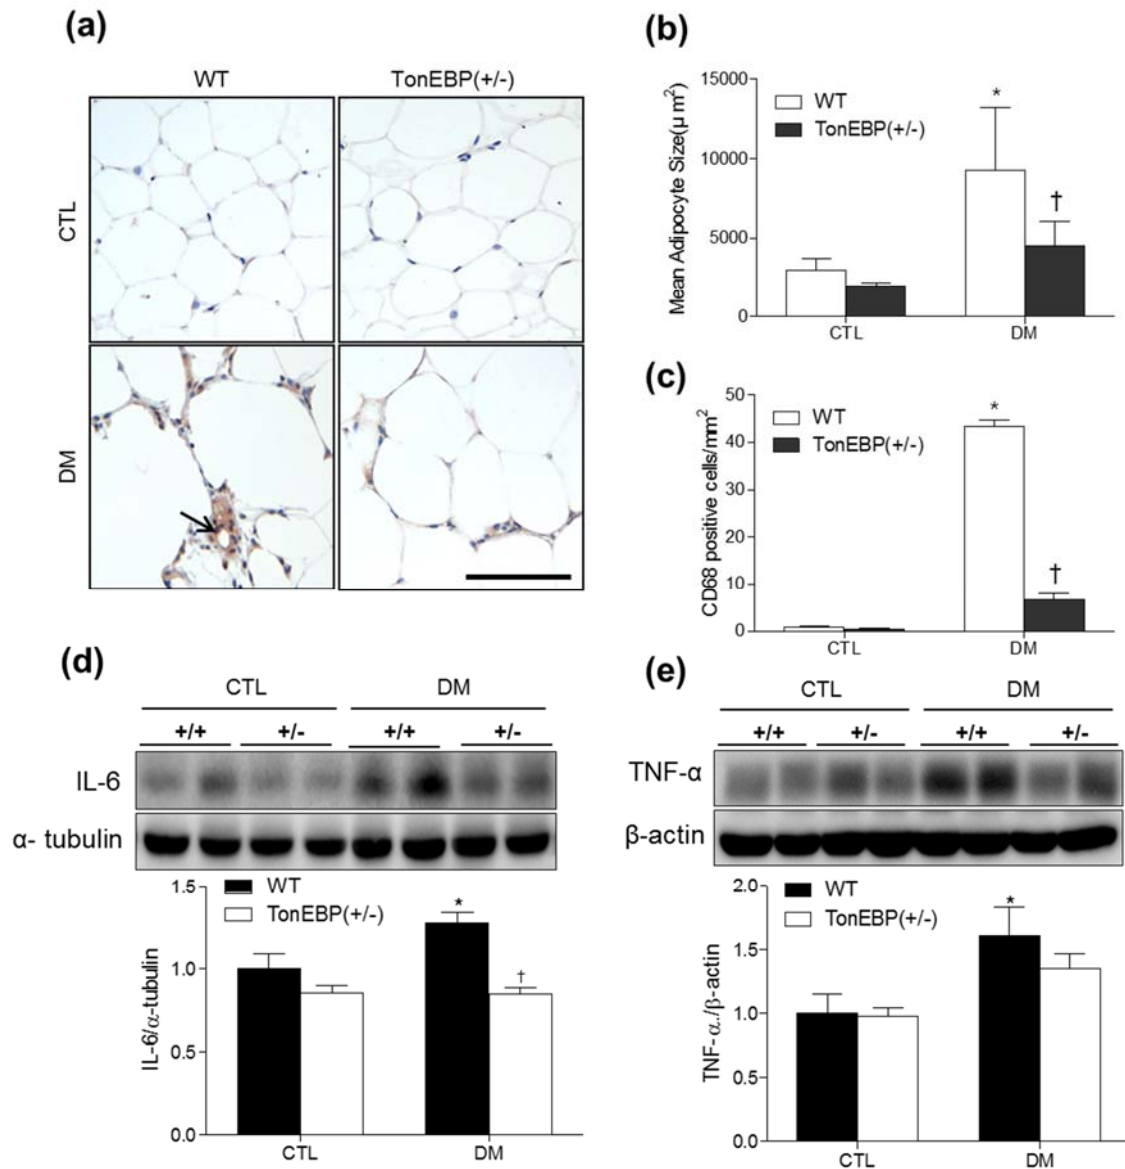

**Supplementary Figure 5. Effects of TonEBP haploinsufficiency on macrophage infiltration and proinflammatory cytokine expression in adipose tissues of HFD/STZ-treated mice.** (a) Representative micrographs of CD68-immunostained liver sections; scale bar = 50 μm. Arrow indicates a macrophage. Mean adipose size (b) and number (c) of CD68-positive cells. Western blotting and quantification of IL-6 (d) and TNF-α (e) in epididymal fat pad tissues. Data are presented as the mean ± SEM from three separate experiments (n = 6 mice per group). \* $P < 0.05$  vs. control (CTL) normal diet-fed mice; † $P < 0.05$  vs. DM WT mice.

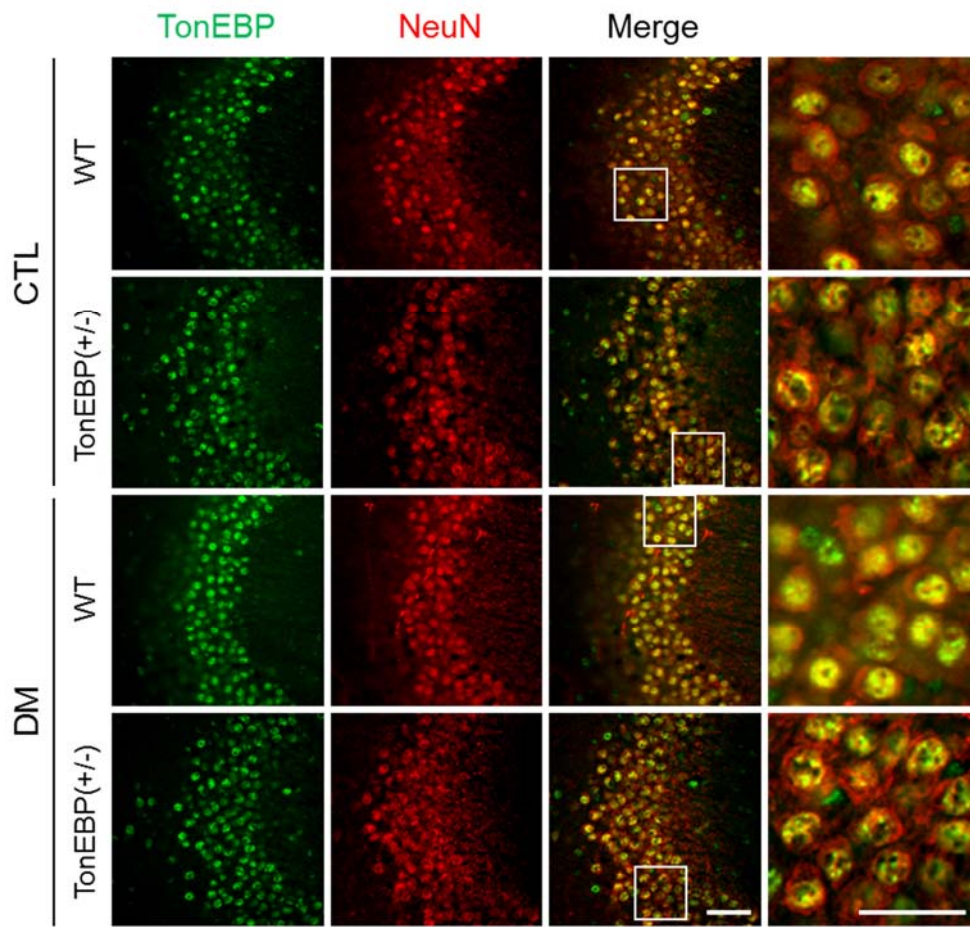

**Supplementary Figure 6. Hippocampal TonEBP expression in HFD/STZ-treated  $\text{TonEBP}^{+/-}$  mice.** Representative micrographs of TonEBP (green) and NeuN (red)-immunostained hippocampal CA3 sections; scale bar = 50  $\mu\text{m}$  (inset, 25  $\mu\text{m}$ ).

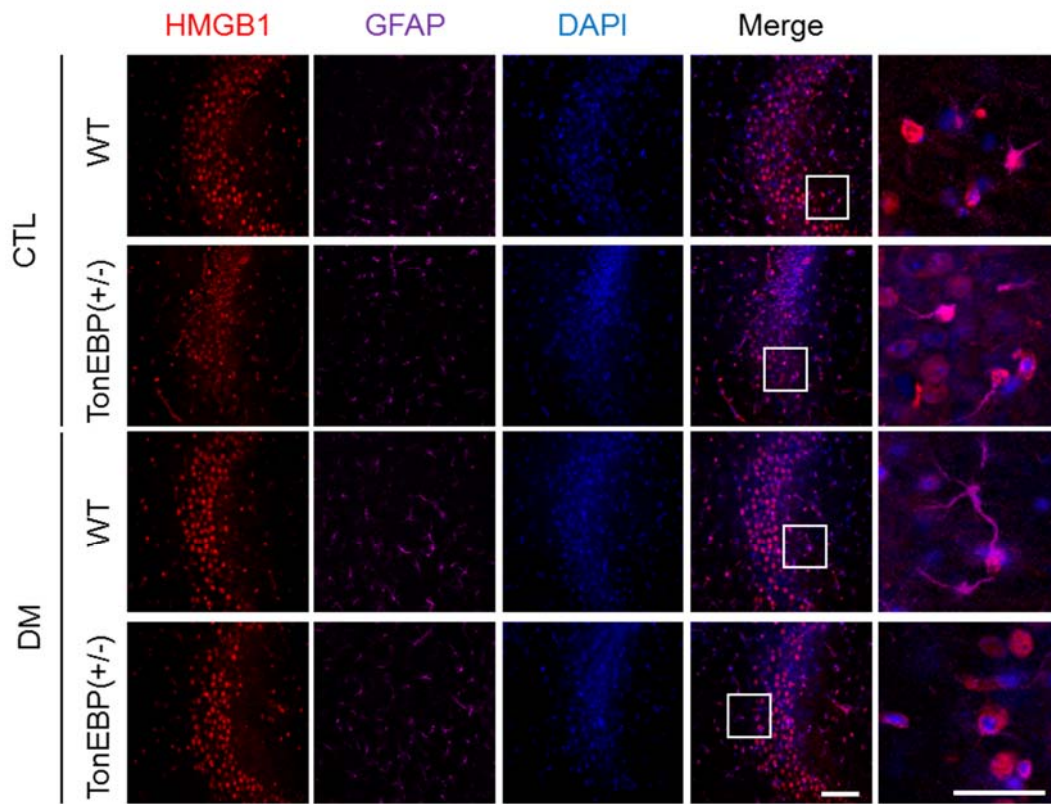

**Supplementary Figure 7. Hippocampal HMGB1 and GFAP expression in HFD/STZ-treated *TonEBP*<sup>+/-</sup> mice.** Representative micrographs of HMGB1 (red) and GFAP (purple)-immunostained hippocampal CA3 sections from control (CTL) mice and HFD/STZ-treated (DM) mice; scale bar = 50  $\mu$ m (inset, 25  $\mu$ m).

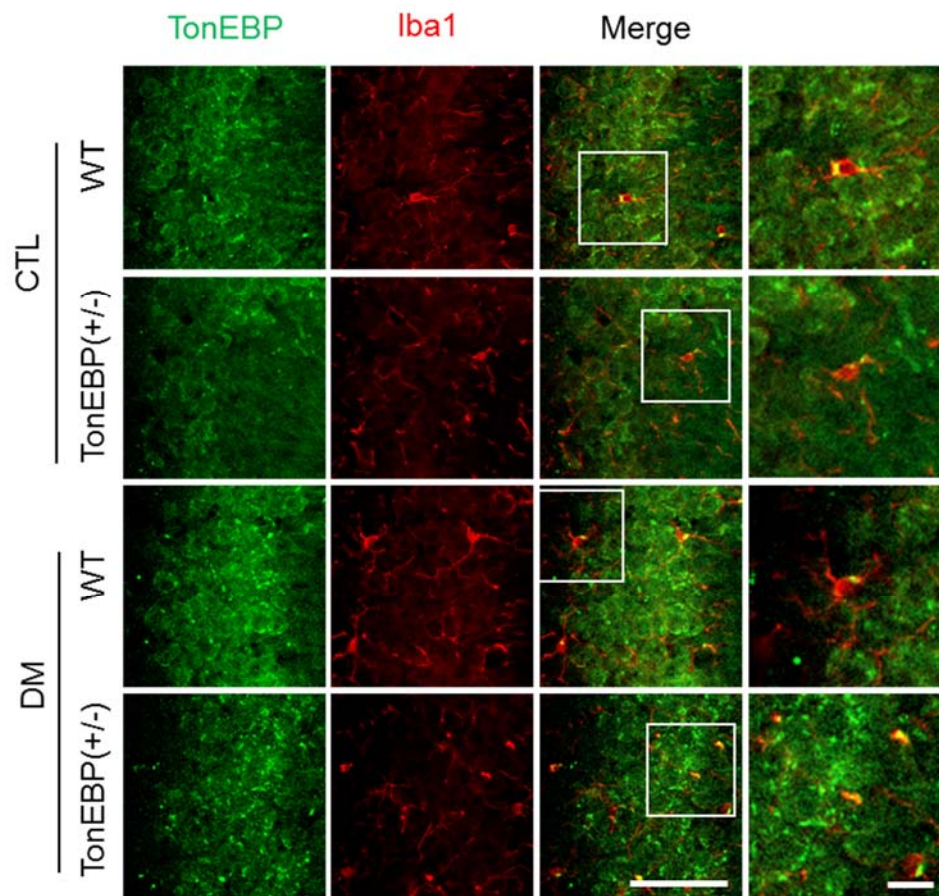

**Supplementary Figure 8. Hippocampal Iba1 expression in HFD/STZ-treated TonEBP<sup>+/-</sup> mice.** Representative micrographs of TonEBP (green) and Iba1 (red)-immunostained hippocampal CA3 sections from control (CTL) mice and HFD/STZ-treated (DM) mice; scale bar = 50  $\mu$ m (inset, 25  $\mu$ m).

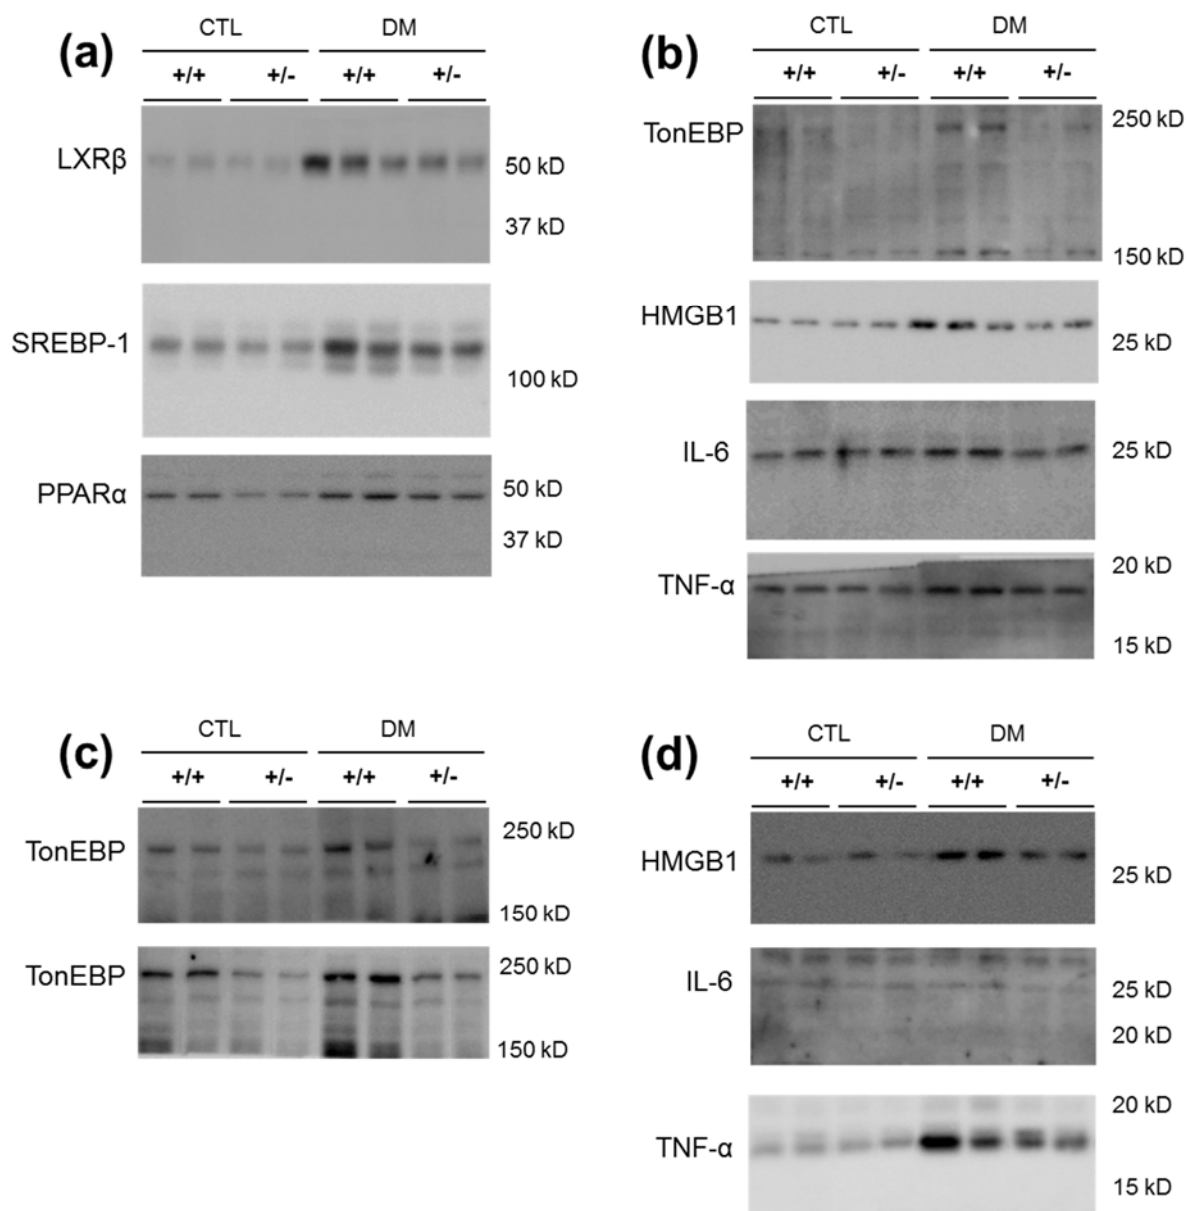

**Supplementary Figure 9.** (a) Full-length blots and multiple exposures of Figure 2d-f. (b) Full-length blots and multiple exposures of Figure 3b-f. (c) Full-length blots and multiple exposures of Figure 4a,b. (d) Full-length blots and multiple exposures of Figure 5a,d.
